# Supplementary material for: Use of Selective Serotonin-Reuptake Inhibitors in Pregnancy and the Risk of Birth Defects
Source: Atypon-hosted journal article supplement (doi:10.1056/nejmoa066584), 2007-06-27
Supplement: nejm_alwan_2684sa1.pdf [file nejm_alwan_2684sa1.pdf]

## Supplementary Appendix

This appendix has been provided by the authors to give readers additional information about their work.

Supplement to: Alwan S, Reefhuis J, Rasmussen SA, Olney RS, Friedman JM. Use of selective serotonin-reuptake inhibitors in pregnancy and the risk of birth defects. *N Engl J Med* 2007;356:2684-92.

**Supplementary Table 1.** Associations between Maternal Use of Any SSRI and Birth Defects Stratified by Prepregnancy Obesity.\*

| Birth Defect                                           | No SSRI                |     |                               | SSRI      |                      |       |                      | P-value mult. interaction |
|--------------------------------------------------------|------------------------|-----|-------------------------------|-----------|----------------------|-------|----------------------|---------------------------|
|                                                        | Not obese <sup>†</sup> |     | Obese<br>Crude OR<br>(95% CI) | Not obese |                      | Obese |                      |                           |
|                                                        | No.                    | No. |                               | No.       | Crude OR<br>(95% CI) | No.   | Crude OR<br>(95% CI) |                           |
| No major defects (control infants)                     | 3241                   | 559 |                               | 70        |                      | 13    |                      |                           |
| Anencephaly                                            | 161                    | 29  | 1.0 (0.7-1.6)                 | 7         | 2.0 (0.8-4.5)        | 2     |                      | ‡                         |
| Spina bifida                                           | 310                    | 110 | 2.1 (1.6-2.6)                 | 1         |                      | 5     | 4.0 (1.1-12.1)       | ‡                         |
| Conotruncal heart defects                              | 712                    | 157 | 1.3 (1.0-1.6)                 | 15        | 1.0 (0.5-1.7)        | 10    | 3.5 (1.4-8.7)        | 0.05                      |
| Septal heart defects                                   | 1423                   | 317 | 1.3 (1.1-1.5)                 | 27        | 0.9 (0.5-1.4)        | 16    | 2.8 (1.3-6.4)        | 0.04                      |
| Right ventricular outflow tract obstruction            | 480                    | 120 | 1.4 (1.2-1.8)                 | 12        | 1.2 (0.6-2.2)        | 4     | 2.1 (0.5-6.7)        | 0.75                      |
| Left ventricular outflow tract obstruction             | 513                    | 115 | 1.3 (1.0-1.6)                 | 10        | 1.0 (0.4-1.8)        | 4     | 1.9 (0.4-6.3)        | 0.45                      |
| Cleft lip with or without palate                       | 882                    | 157 | 1.0 (0.8-1.3)                 | 13        | 0.7 (0.3-1.2)        | 8     | 2.3 (0.8-5.9)        | 0.03                      |
| Cleft Palate alone                                     | 476                    | 100 | 1.2 (0.9-1.5)                 | 9         | 0.9 (0.4-1.8)        | 2     | 1.0 (0.1-4.6)        | 0.98                      |
| Esophageal atresia                                     | 232                    | 40  | 1.0 (0.7-1.4)                 | 7         | 1.4 (0.5-3.1)        | 2     | 2.1 (0.2-9.6)        | 0.62                      |
| Anorectal atresia                                      | 298                    | 74  | 1.4 (1.1-1.9)                 | 8         | 1.2 (0.5-2.6)        | 0     |                      | ‡                         |
| Hypospadias, 2 <sup>nd</sup> or 3 <sup>rd</sup> degree | 661                    | 114 | 1.1 (0.9-1.4)                 | 7         | 0.5 (0.2-1.1)        | 7     | 2.2 (0.7-6.9)        | 0.04                      |
| Transverse limb deficiencies                           | 263                    | 53  | 1.2 (0.8-1.6)                 | 6         | 1.1 (0.4-2.4)        | 2     |                      | ‡                         |
| Craniosynostosis                                       | 338                    | 59  | 1.0 (0.7-1.3)                 | 15        | 2.0 (1.1-3.7)        | 8     | 5.9 (2.4-14.3)       | 0.06                      |
| Omphalocele                                            | 132                    | 28  | 1.2 (0.8-1.9)                 | 6         | 2.1 (0.9-4.9)        | 4     | 7.5 (2.4-23.4)       | 0.15                      |
| Diaphragmatic hernia                                   | 219                    | 53  | 1.4 (1.0-1.9)                 | 9         | 1.9 (0.8-3.9)        | 1     |                      | ‡                         |
| Gastroschisis                                          | 378                    | 12  | 0.2 (0.1-0.3)                 | 10        | 1.2 (0.6-2.4)        | 1     |                      | ‡                         |

\* SSRI use is reported for the period from 1 month before to 3 months after conception. Data are taken from the National Birth Defects Prevention Study for the period 1997 through 2002. Obesity defined as weight (kg) divided by height (m) squared, 30 or greater. SSRI denotes selective serotonin reuptake inhibitor, mult. multiplicative, OR odds ratio, and CI confidence interval. Infants whose mothers had prepregnancy diabetes mellitus type 1 or 2 are excluded.

† Reference category.

‡ Multiplicative interaction not calculated due to sparse cells ( $\leq 2$  exposed cases)

**Supplementary Table 2.** Associations between Maternal Use of Any SSRI and Isolated Birth Defects.\*

| Birth Defect                                           | No. of infants | No. exposed | Crude Analysis | Adjusted Analysis <sup>†</sup> |         |
|--------------------------------------------------------|----------------|-------------|----------------|--------------------------------|---------|
|                                                        |                |             | OR (95% CI)    | OR (95% CI)                    | P-value |
| No major defects (control infants)                     | 4092           | 83          |                |                                |         |
| Anencephaly                                            | 194            | 9           | 2.4 (1.1-4.7)  | 2.6 (1.2-5.6)                  | 0.02    |
| Spina bifida                                           | 410            | 5           | 0.6 (0.2-1.4)  | 0.5 (0.2-1.5)                  | 0.25    |
| Conotruncal heart defects                              | 818            | 17          | 1.0 (0.6-1.8)  | 1.1 (0.6-1.8)                  | 0.74    |
| Septal heart defects                                   | 1563           | 31          | 1.0 (0.6-1.5)  | 1.0 (0.6-1.5)                  | 0.34    |
| Right ventricular outflow tract obstruction            | 610            | 15          | 1.2 (0.7-2.1)  | 1.3 (0.7-2.3)                  | 0.36    |
| Left ventricular outflow tract obstruction             | 610            | 11          | 0.9 (0.4-1.7)  | 0.8 (0.4-1.6)                  | 0.70    |
| Cleft lip with or without palate                       | 994            | 20          | 1.0 (0.6-1.6)  | 0.8 (0.5-1.5)                  | 0.61    |
| Cleft palate alone                                     | 504            | 10          | 1.0 (0.5-1.9)  | 0.9 (0.5-1.8)                  | 0.79    |
| Anorectal atresia                                      | 182            | 4           | 1.1 (0.4-3.0)  | 0.8 (0.2-2.7)                  | 0.77    |
| Hypospadias, 2 <sup>nd</sup> or 3 <sup>rd</sup> degree | 754            | 13          | 0.8 (0.4-1.5)  | 0.7 (0.4-1.4)                  | 0.35    |
| Transverse limb deficiencies                           | 292            | 8           | 1.4 (0.5-2.9)  | 1.4 (0.7-3.1)                  | 0.31    |
| Craniosynostosis                                       | 387            | 22          | 2.9 (1.8-4.7)  | 2.5 (1.5-4.2)                  | <0.001  |
| Omphalocele                                            | 100            | 4           | 2.0 (0.7-5.7)  | 1.6 (0.5-5.4)                  | 0.41    |
| Diaphragmatic hernia                                   | 236            | 8           | 1.7 (0.8-3.5)  | 1.5 (0.7-3.5)                  | 0.25    |
| Gastroschisis                                          | 379            | 11          | 1.4 (0.7-2.7)  | 1.4 (0.7-2.8)                  | 0.27    |

\* SSRI use is reported for the period from 1 month before to 3 month after conception. Data are taken from the National Birth Defects Prevention Study for the period from 1997 through 2002. SSRI denotes selective serotonin reuptake inhibitor, OR odds ratio, and CI confidence interval.

<sup>†</sup> Odds ratios are adjusted for maternal race or ethnic group, maternal obesity, maternal smoking and family income. Infants whose mothers had prepregnancy diabetes mellitus type 1 or 2 are excluded.

**Supplementary Table 3. Associations between Maternal Use of Fluoxetine, Sertraline or Paroxetine and Birth Defects\***

| Birth Defect                                           | No. of infants | Fluoxetine |                                   | Sertraline |                                   | Paroxetine |                                   |
|--------------------------------------------------------|----------------|------------|-----------------------------------|------------|-----------------------------------|------------|-----------------------------------|
|                                                        |                | No.        | Adjusted <sup>†</sup> OR (95% CI) | No.        | Adjusted <sup>†</sup> OR (95% CI) | No.        | Adjusted <sup>†</sup> OR (95% CI) |
| No major defects (control infants)                     | 4092           | 29         |                                   | 32         |                                   | 18         |                                   |
| Anencephaly                                            | 214            | 0          |                                   | 4          | 3.2 (1.1-9.3)                     | 5          | 5.1 (1.7-15.3)                    |
| Spina bifida                                           | 457            | 1          |                                   | 5          | 1.2 (0.4-3.5)                     | 0          |                                   |
| Conotruncal heart defects                              | 977            | 6          | 0.9 (0.4-2.3)                     | 9          | 1.3 (0.6-2.7)                     | 7          | 1.6 (0.7-4.0)                     |
| Septal heart defects                                   | 1931           | 17         | 1.3 (0.7-2.4)                     | 10         | 0.7 (0.3-1.5)                     | 15         | 1.7 (0.8-3.5)                     |
| Right ventricular outflow tract obstruction            | 669            | 4          | 0.9 (0.3-2.7)                     | 4          | 0.8 (0.3-2.3)                     | 7          | 2.5 (1.0-6.0)                     |
| Left ventricular outflow tract obstruction             | 691            | 6          | 1.3 (0.5-3.1)                     | 2          | 0.4 (0.1-1.6)                     | 5          | 1.3 (0.4-3.8)                     |
| Cleft lip with or without palate                       | 1127           | 7          | 0.9 (0.4-2.1)                     | 9          | 0.9 (0.4-2.0)                     | 7          | 1.3 (0.5-3.1)                     |
| Cleft palate alone                                     | 620            | 5          | 1.1 (0.4-3.0)                     | 3          | 0.6 (0.2-1.9)                     | 5          | 1.7 (0.6-4.8)                     |
| Esophageal atresia                                     | 300            | 5          | 2.4 (0.9-6.4)                     | 2          |                                   | 1          |                                   |
| Anorectal atresia                                      | 418            | 1          |                                   | 4          | 0.7 (0.2-2.8)                     | 2          |                                   |
| Hypospadias, 2 <sup>nd</sup> or 3 <sup>rd</sup> degree | 823            | 6          | 0.8 (0.3-2.0)                     | 5          | 0.8 (0.3-2.4)                     | 3          | 0.6 (0.2-2.4)                     |
| Transverse limb deficiencies                           | 346            | 3          | 1.3 (0.4-4.4)                     | 3          | 1.2 (0.4-4.0)                     | 2          |                                   |
| Craniosynostosis                                       | 432            | 10         | 2.8 (1.3-6.1)                     | 6          | 1.7 (0.7-4.2)                     | 5          | 2.3 (0.8-6.4)                     |
| Omphalocele                                            | 181            | 3          | 1.7 (0.4-7.3)                     | 3          | 1.5 (0.4-6.6)                     | 6          | 8.1 (3.1-20.8)                    |
| Diaphragmatic hernia                                   | 297            | 2          |                                   | 4          | 1.8 (0.6-5.3)                     | 2          |                                   |
| Gastroschisis                                          | 413            | 3          | 1.0 (0.3-3.5)                     | 3          | 0.9 (0.3-3.3)                     | 5          | 2.9 (1.0-8.4)                     |

\* Use of fluoxetine, sertraline, and paroxetine is reported for the period from 1 month before to 3 months after conception. Data are taken from the National Birth Defects Prevention Study for the period from 1997 through 2002. OR denotes odds ratio, and CI confidence interval.

† Odds ratios are adjusted for maternal race or ethnic group, maternal obesity, maternal smoking and family income. Infants whose mothers had prepregnancy diabetes mellitus type 1 or 2 are excluded.
